# Supplementary material
Source: publisher figshare collection journal article supplement (https://tandf.figshare.com/ndownloader/files/17891096)
Supplement: Supplementary file 1 [file 17891096]

**Appendix A -Listening ability questionnaire**

Item 1. In a quiet environment, I can have a conversation with someone I know, for example a family member or friend.

Item 2. When someone talks to me without me being able to see the person, I can tell whether the person is a woman or man.

Item 3. On the telephone I can understand someone I do not know.

Item 4. I can follow dialogues when watching a movie or a television program.

Item 5. In a quiet environment, I can have a conversion with someone I do not know.

Item 6. I can enjoy watching a movie at the movie theater.

Item 7. In the car or bus I can have a conversation with someone I know, for example a family member or friend.

Item 8. I can enjoy listening to music.

Item 9. I can hear everyday noises such as keys falling or the microwave beeping.

Item 10. In a busy restaurant, I can understand someone I know, for example a family member or friend.

Item 11. When someone speaks to me without me being able to see the person, I can recognize the voice of someone I know, for example a family member or friend.

Item 12. On the phone, I can understand someone I know, for example a family member or friend.

Item 13. When listening to music, I can recognize the different music instruments.

Item 14. When it is windy, I can have a conversation.

Item 15. I can focus on the person talking, even in noisy places.

Item 16. I can hear comfortably even when I change environments, for example when I move from a quiet place to a noisy place.

For each item, response options are the following:

| Strongly disagree  (1) | Disagree  (2) | Slightly disagree  (3) | Neither agree nor disagree  (4) | Slightly agree  (5) | Agree  (6) | Strongly agree  (7) |
| --- | --- | --- | --- | --- | --- | --- |

Factor *Simple listening situations* (5 items): Items 1, 5, 7, 9, & 10

Factor *Complex listening situations* (6 items): Items 2, 3, 4, 6, 11, & 12

Factor *Music and comfort* (5 items): Items 8, 13, 14, 15, & 16
